# Supplementary material for: Mechanistic insights into metabolic function of dynamin-related protein 1
Source: PubMed Central journal article supplement — J Lipid Res. 2024 Aug 25;65(9):100633. doi: 10.1016/j.jlr.2024.100633 (PMC11426057; doi:10.1016/j.jlr.2024.100633), 2024-08-25

Fig 1A

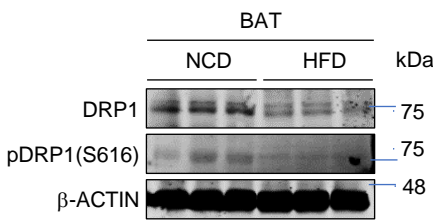

RAW Images

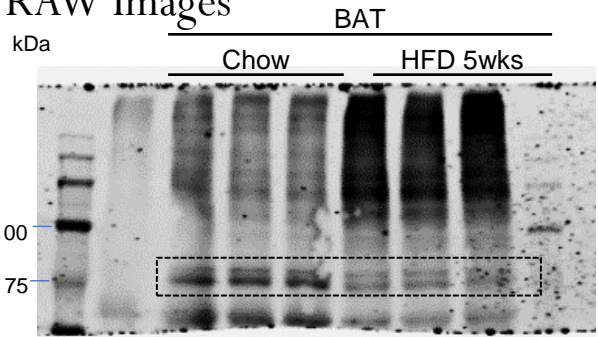

DRP1

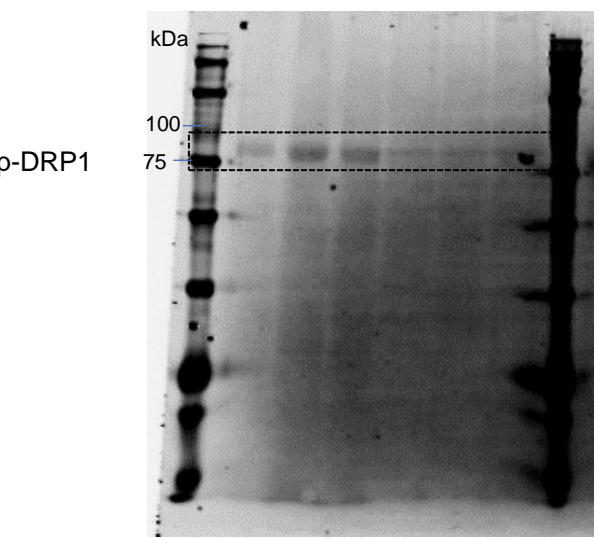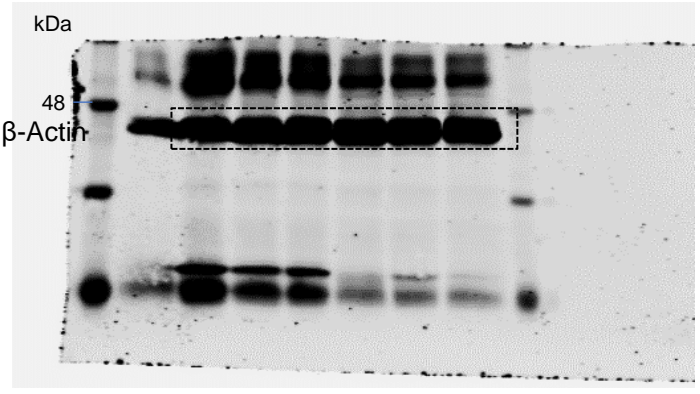

Fig 1B

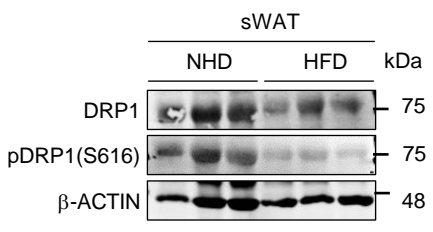

RAW Images

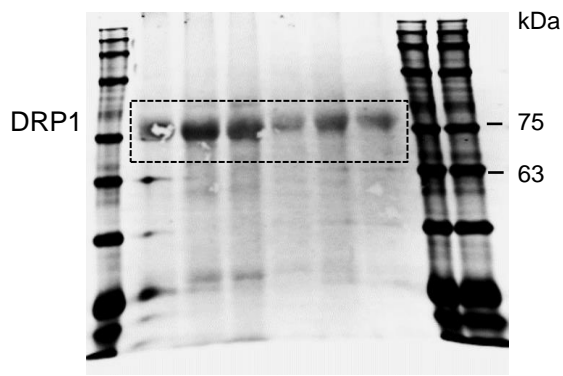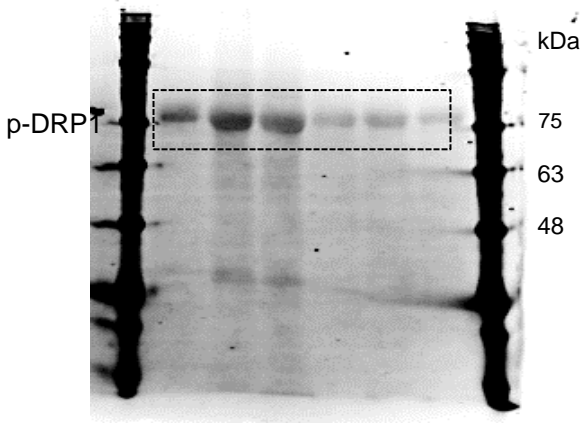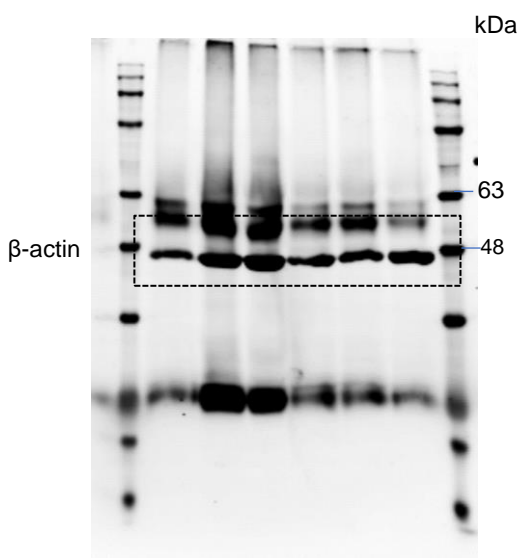

Fig 2L

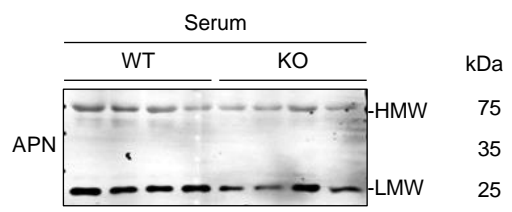

RAW Images

4Western (Original- Ap Apr 800) WT #1-4, KO #1-4Serum

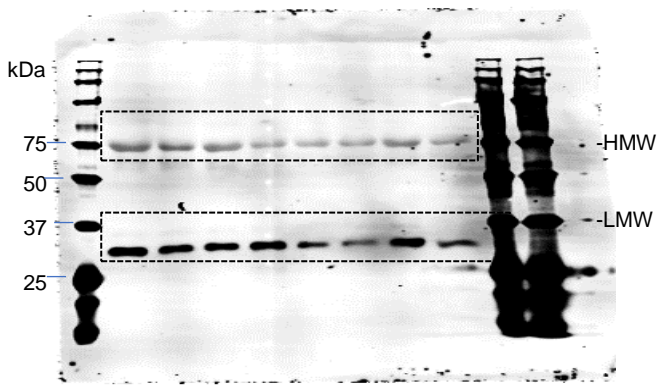



Fig 4Q

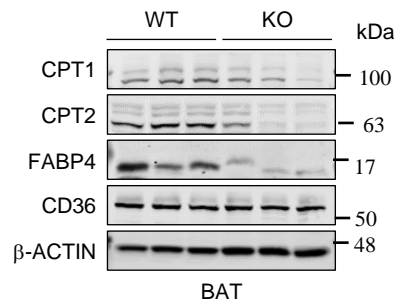

RAW Images

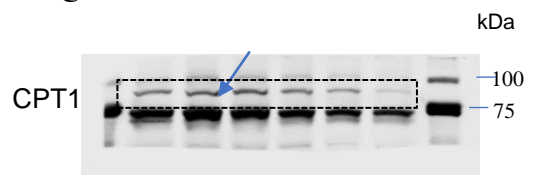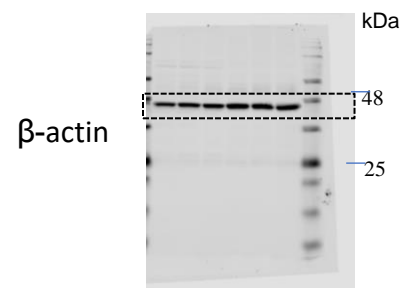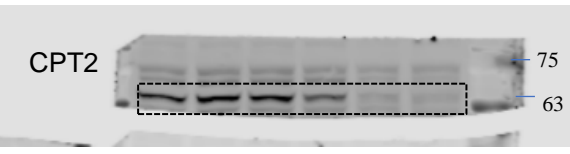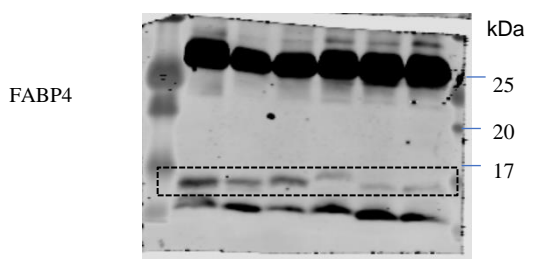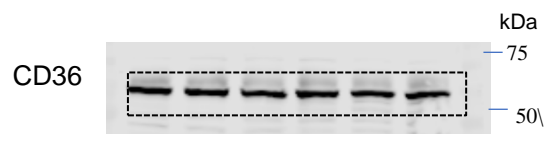

Fig 4R

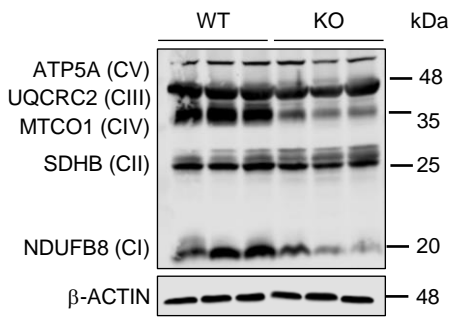

RAW Images

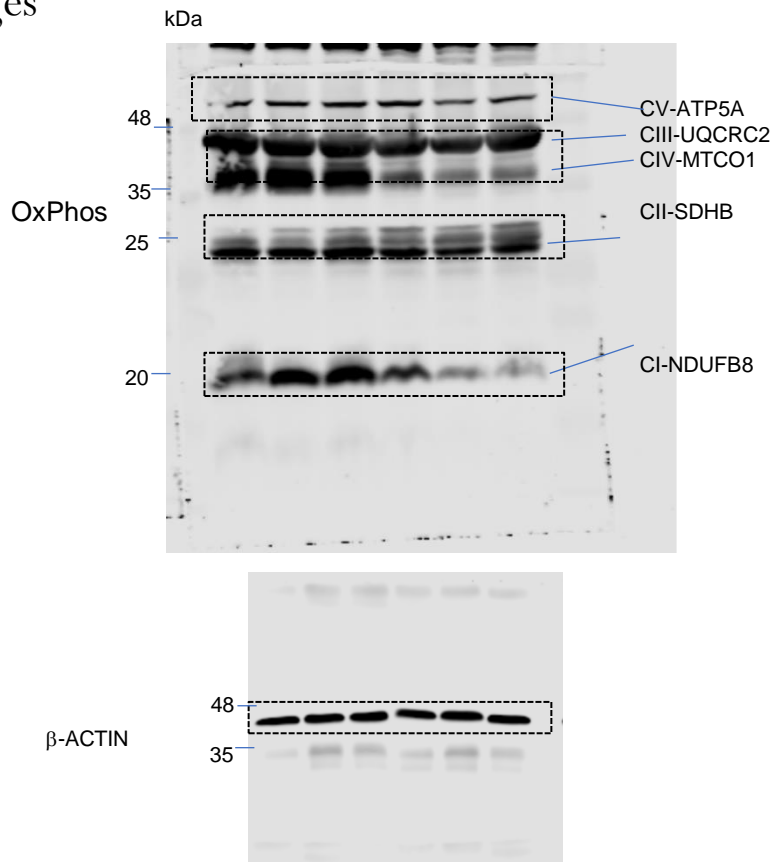

Fig 5A

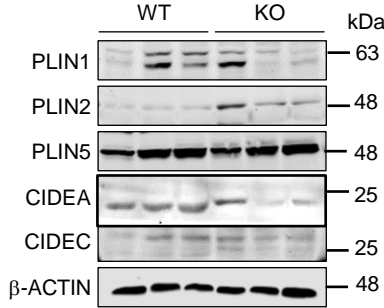

RAW Images

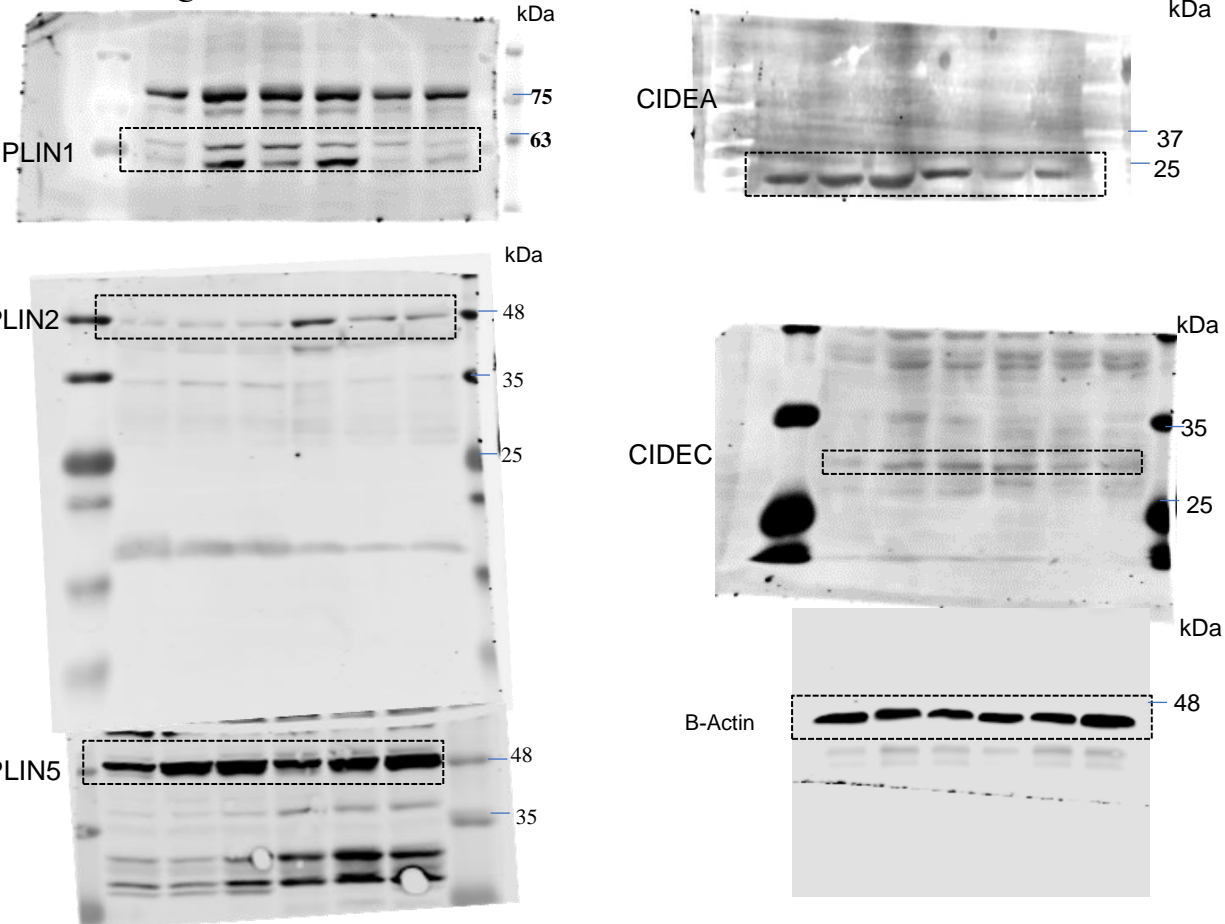

Fig 5C

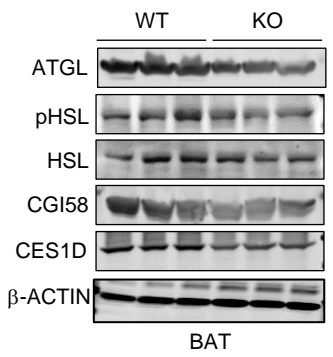

RAW Images

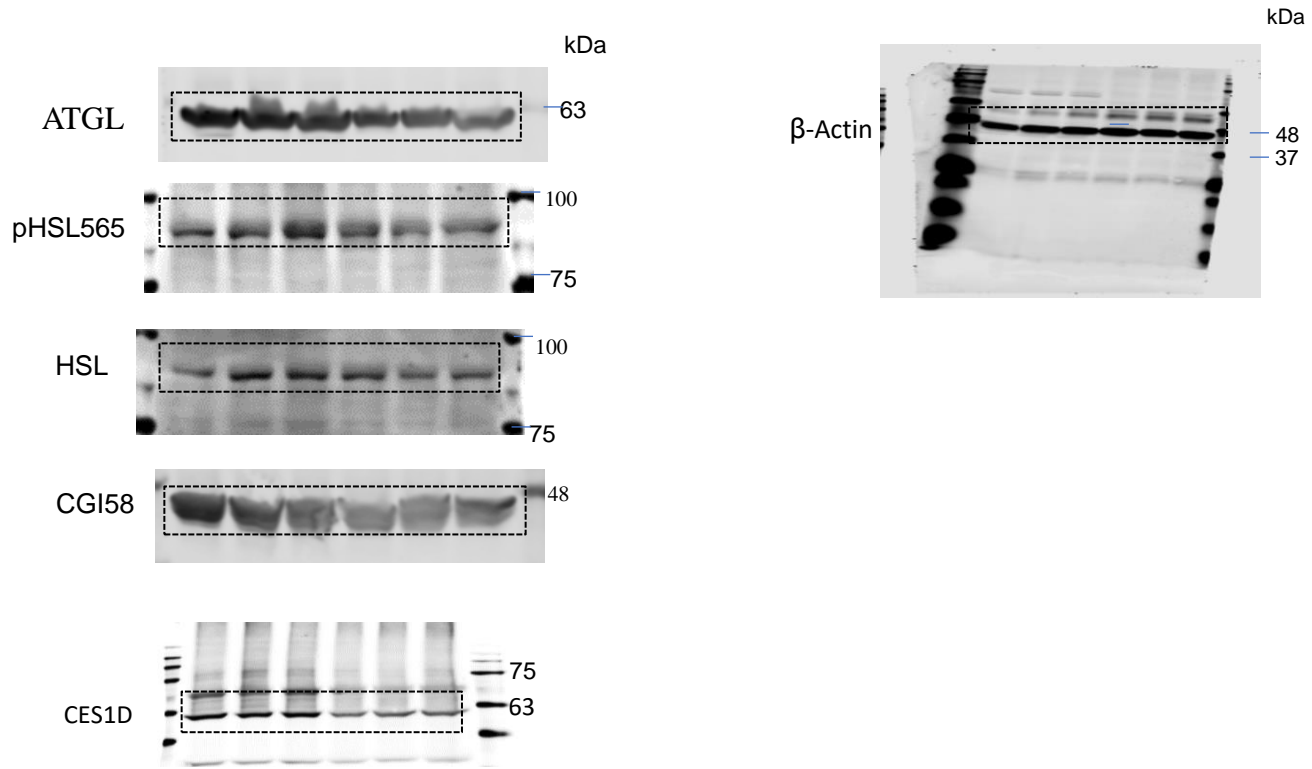



Fig 5E

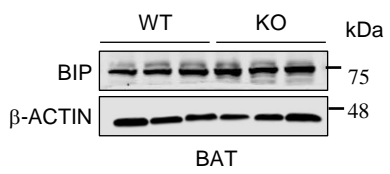

RAW Images

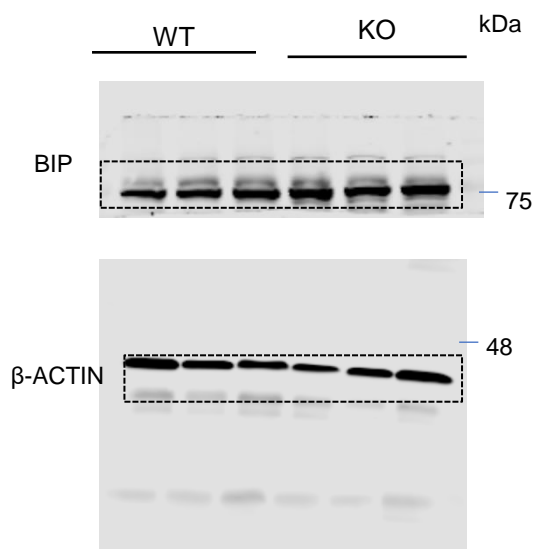

Fig 5H

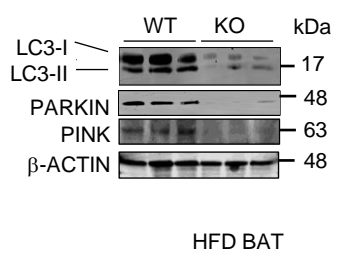

RAW Images

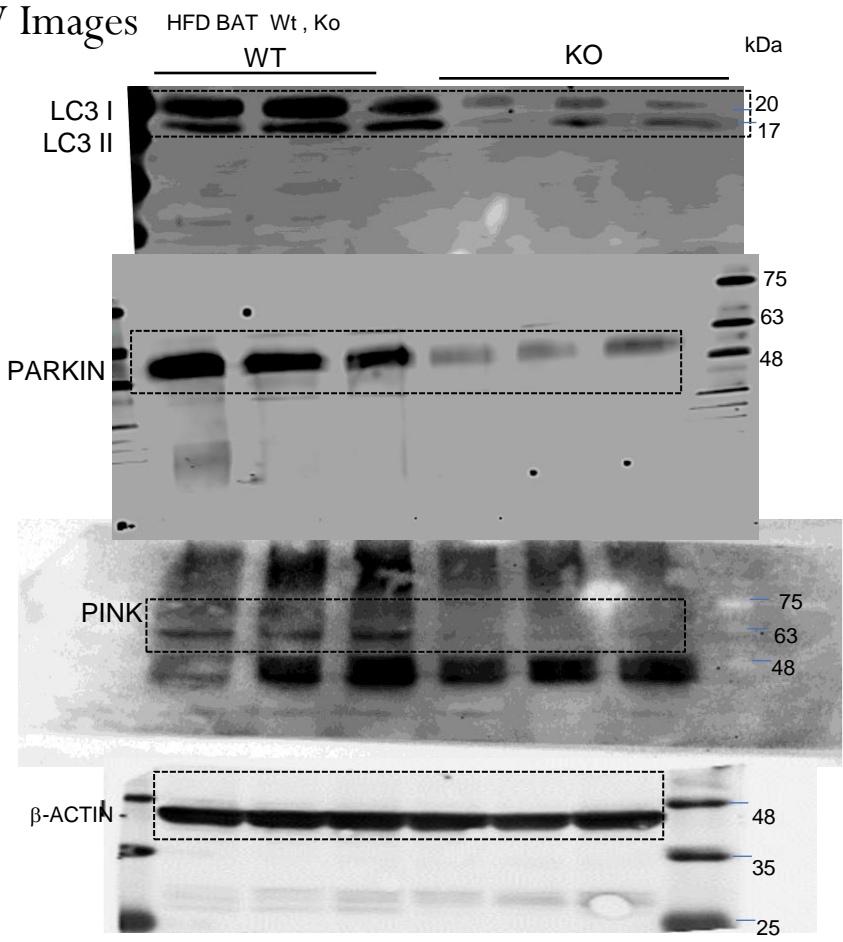

Fig 50

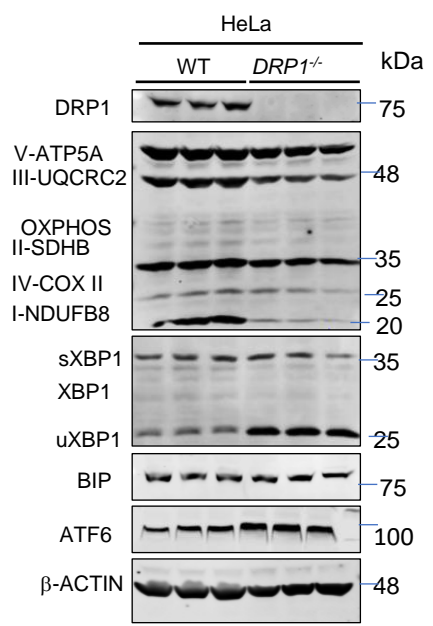

RAW Images

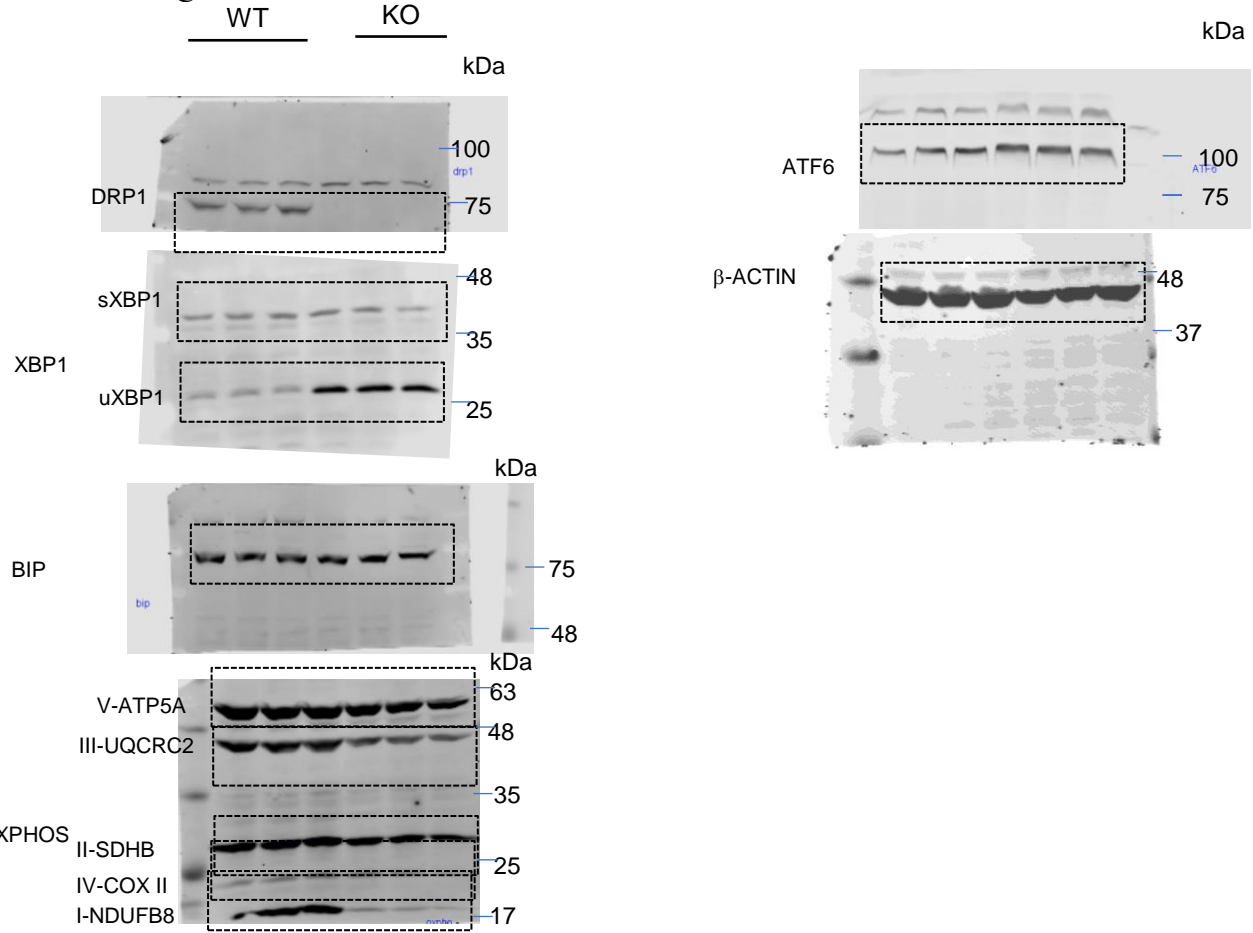

Supplement: mmc2.pdf [file mmc2.pdf]
