# Supplementary material for: Mechanistic insights into metabolic function of dynamin-related protein 1
Source: PubMed Central journal article supplement — J Lipid Res. 2024 Aug 25;65(9):100633. doi: 10.1016/j.jlr.2024.100633 (PMC11426057; doi:10.1016/j.jlr.2024.100633), 2024-08-25
Supplement: mmc1.pdf [file mmc1.pdf]

# Supplementary Figure 1

**A**

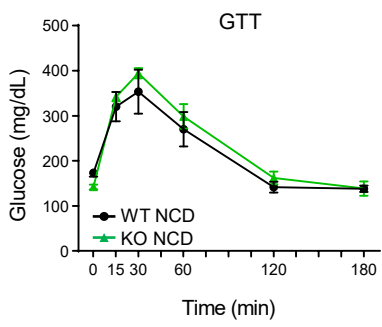

**B**

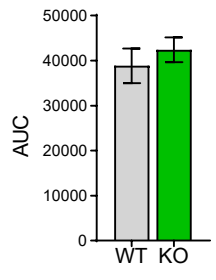

**C**

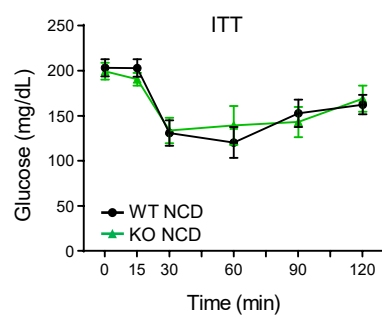

**D**

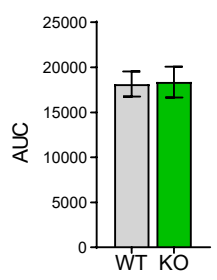

**(A, B)** Glucose tolerance test (GTT) with the area under the curve (AUC) in NCD-fed WT and KO mice (n = 6/group).

**(C, D)** Insulin tolerance test (ITT) with AAC in NCD-fed WT and KO mice (n = 6/group). Unpaired Student's *t*-test.

# Supplementary Figure 2

A

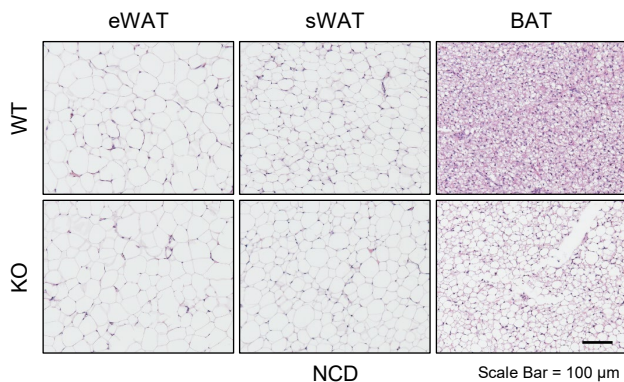

B

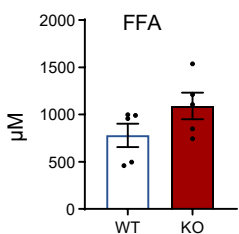

C

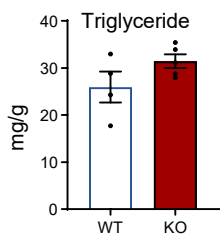

D

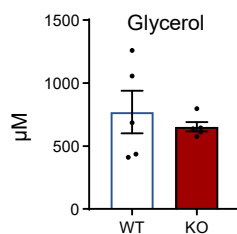

E

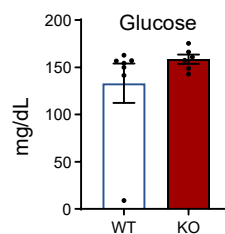

F

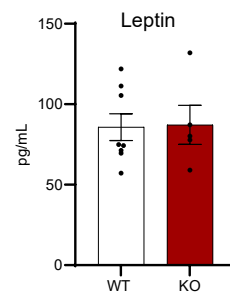

**(A)** Representative H&E staining of sWAT, eWAT, and BAT in the WT and KO mice fed on NCD. Scale bar = 100 μm.

**(B)** The levels of free fatty acids (FFA) in livers from chow-fed mice (n = 5 for WT, n = 5 for KO).

**(C)** The levels of triglyceride (TAG) in fasted serum from chow-fed mice (n = 5 for WT, n = 5 for KO).

**(D)** The levels of glycerol in the liver of chow-fed mice (n = 5 for WT, n = 5 for KO).

**(E)** The levels of circulating glucose in chow-fed mice (n = 5 for WT, n = 5 for KO)

**(F)** The levels of leptin in the serum of chow-fed mice (n = 5 for WT, n=5 for KO).

For **(B)-(F)**: unpaired student t-test, no statistical significance.

# Supplementary Figure 3

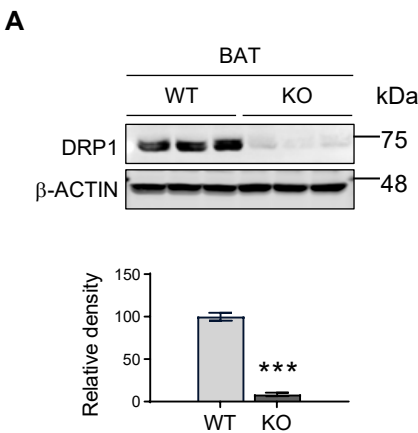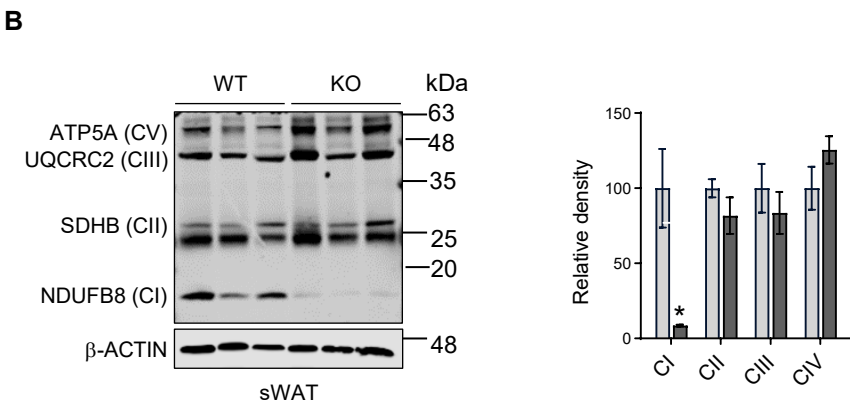

(A) Representative western blots and densitometric analysis of DRP1 in the BAT of HFD-fed WT and KO mice (n = 3/group).

(B) Representative western blots and densitometric analysis of oxidative phosphorylation (OXPHOS) protein complexes in the sWAT of HFD-fed WT and KO mice (n = 3/group).

\*P < 0.05, \*\*\*P < 0.001, unpaired Student's *t*-test.

# Supplementary Figure 4

A

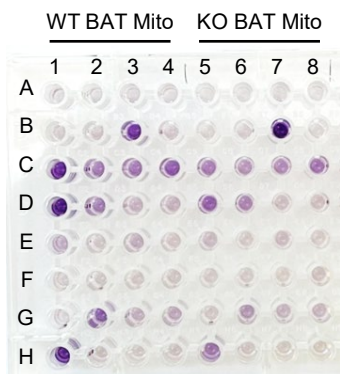

B

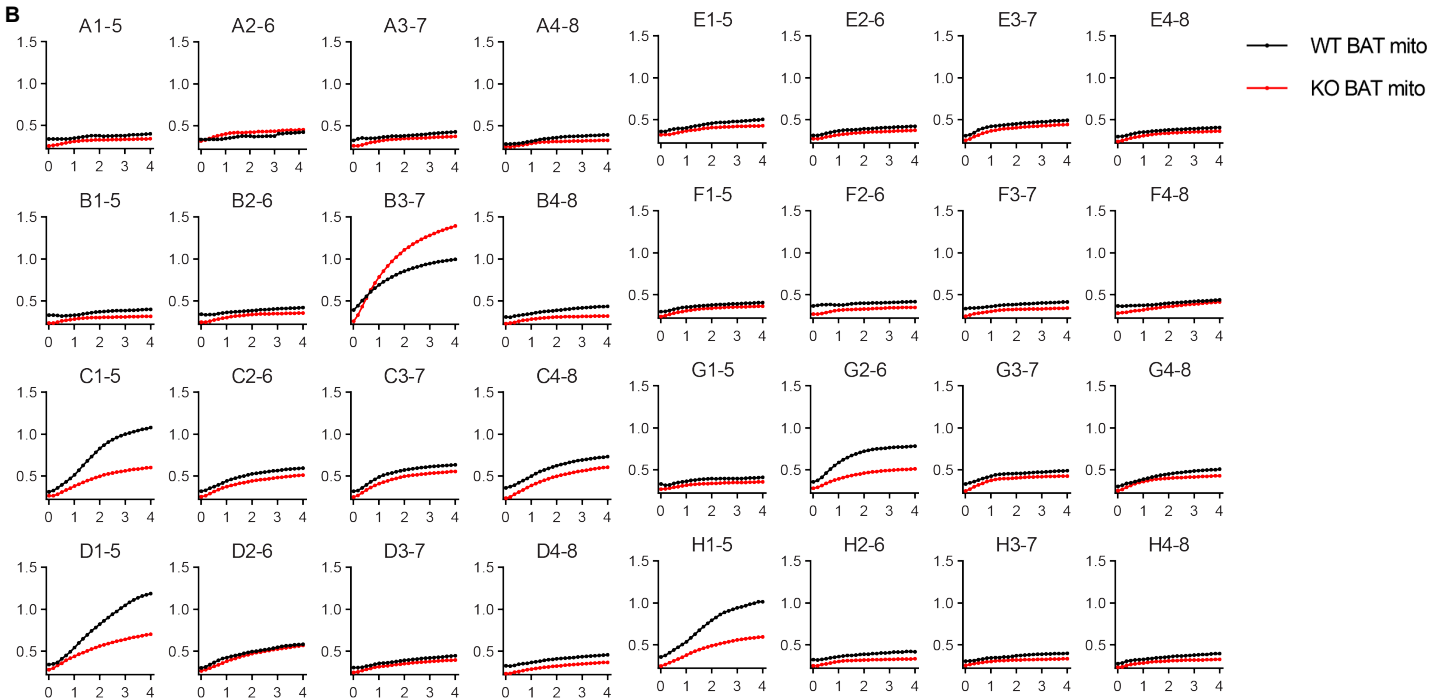

(A) Image of the color-reaction plates (Figure 4. X) after a 4-hour incubation. Redox Dye turned purple upon receiving the electrons from ETC when mitochondria utilized the indicated substrates. The information about pre-coated substrates for each well is attached in Table 1.

(B) Kinetics of electron transport in the isolated mitochondria in the presence of mitochondrial substrates. The reading for the entire analysis plate was shown. Mitochondria were isolated from the BAT of WT and KO mice fed on NCD.

# Supplementary Figure 5

**A**

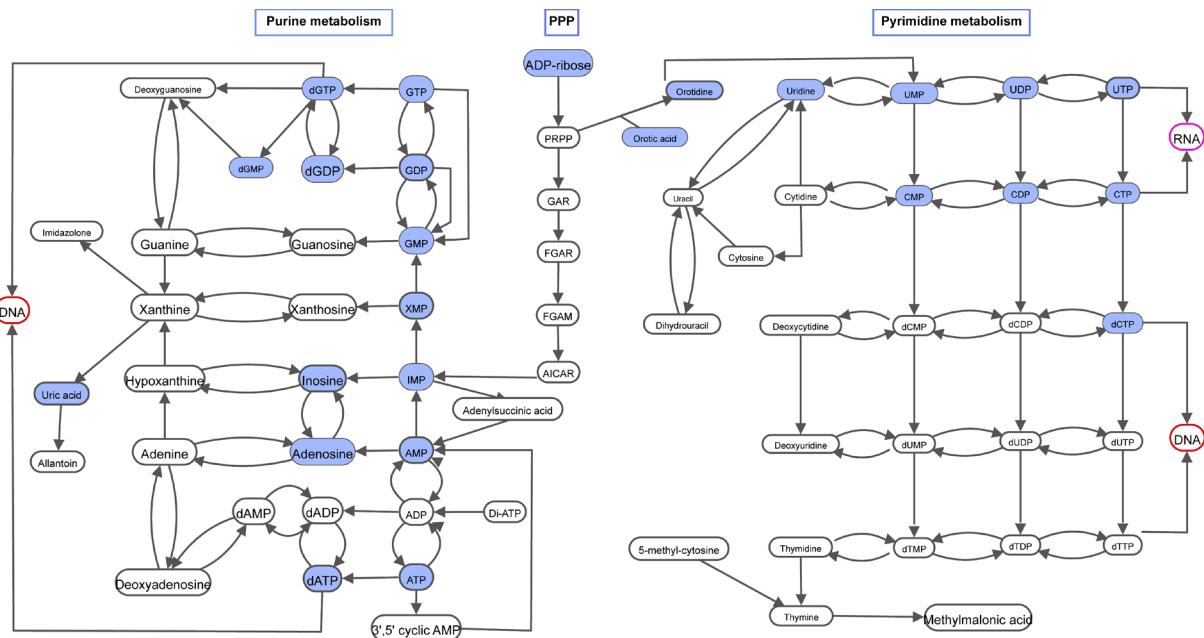

**B**

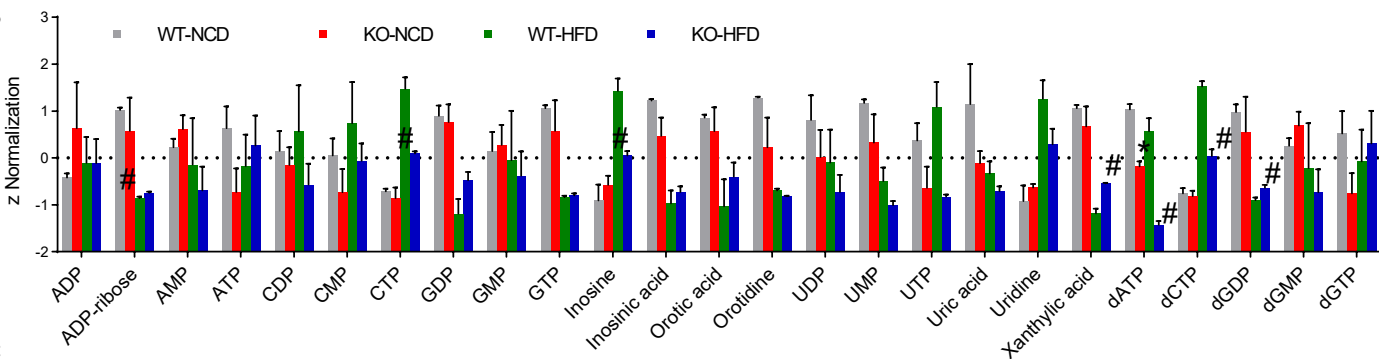

**C**

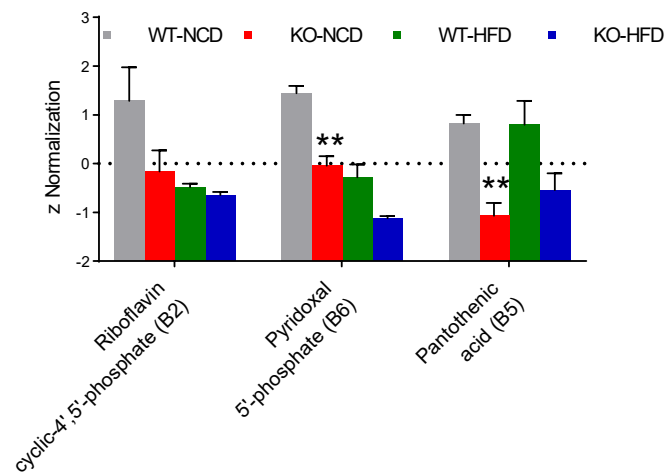

(A) Diagram of purine and pyrimidine metabolism pathways. Solid blue boxes indicate the metabolites detected.

(B) The levels of detected metabolites that are involved in purine and pyrimidine metabolism.

(C) Comparison of the levels of vitamin B2, B6, and B5 in WT and KO mice.  $n = 3/\text{group}$ , \* $P < 0.05$ , \*\* $P < 0.01$ , \*\*\* $P < 0.001$ , # $P < 0.05$ . KO v.s. WT (under HFD), one-way ANOVA followed by Turkey's post hoc test.

**Supplementary Figure 6: List of substrates incubated with mitochondria from WT and KO**

| Substrates | Isolated mitochondria from the BAT of WT mice |                                             |                                         |                                        | Isolated mitochondria from the BAT of KO mice |                                             |                                         |                                        |
|------------|-----------------------------------------------|---------------------------------------------|-----------------------------------------|----------------------------------------|-----------------------------------------------|---------------------------------------------|-----------------------------------------|----------------------------------------|
|            | 1                                             | 2                                           | 3                                       | 4                                      | 5                                             | 6                                           | 7                                       | 8                                      |
| A          | No Substrate                                  | $\alpha$ -D-Glucose                         | Glycogen                                | D-Glucose-1-PO <sub>4</sub>            | No Substrate                                  | $\alpha$ -D-Glucose                         | Glycogen                                | D-Glucose-1-PO <sub>4</sub>            |
| B          | D-Glucose-6-PO <sub>4</sub>                   | D-Gluconate-6-PO <sub>4</sub>               | D,L- $\alpha$ -Glycerol-PO <sub>4</sub> | L-Lactic Acid                          | D-Glucose-6-PO <sub>4</sub>                   | D-Gluconate-6-PO <sub>4</sub>               | D,L- $\alpha$ -Glycerol-PO <sub>4</sub> | L-Lactic Acid                          |
| C          | Pyruvic Acid                                  | Citric Acid                                 | D,L-Isocitric Acid                      | cis-Aconitic Acid                      | Pyruvic Acid                                  | Citric Acid                                 | D,L-Isocitric Acid                      | cis-Aconitic Acid                      |
| D          | $\alpha$ -Keto-Glutaric Acid                  | Succinic Acid                               | Fumaric Acid                            | L-Malic Acid                           | $\alpha$ -Keto-Glutaric Acid                  | Succinic Acid                               | Fumaric Acid                            | L-Malic Acid                           |
| E          | $\alpha$ -Keto-Butyric Acid                   | D,L- $\beta$ -Hydroxy-Butyric Acid          | L-Glutamic Acid                         | L-Glutamine                            | $\alpha$ -Keto-Butyric Acid                   | D,L- $\beta$ -Hydroxy-Butyric Acid          | L-Glutamic Acid                         | L-Glutamine                            |
| F          | Ala-Gln                                       | L-Serine                                    | L-Ornithine                             | Tryptamine                             | Ala-Gln                                       | L-Serine                                    | L-Ornithine                             | Tryptamine                             |
| G          | L-Malic Acid                                  | Acetyl-L-Carnitine + L-Malic Acid           | Octanoyl-L-Carnitine + L-Malic Acid     | Palmitoyl-D,L-Carnitine + L-Malic Acid | L-Malic Acid                                  | Acetyl-L-Carnitine + L-Malic Acid           | Octanoyl-L-Carnitine + L-Malic Acid     | Palmitoyl-D,L-Carnitine + L-Malic Acid |
| H          | Pyruvic Acid + L-Malic Acid                   | $\gamma$ -Amino-Butyric Acid + L-Malic Acid | A-Keto-Isocaproic Acid + L-Malic Acid   | L-Leucine + L-Malic Acid               | Pyruvic Acid + L-Malic Acid                   | $\gamma$ -Amino-Butyric Acid + L-Malic Acid | A-Keto-Isocaproic Acid + L-Malic Acid   | L-Leucine + L-Malic Acid               |

### Supplementary Figure 7: Primers used for the q-PCR analysis

| <b>Mouse</b> | <b>Forward (5'-3')</b>    | <b>Reverse (5'-3')</b>    |
|--------------|---------------------------|---------------------------|
| β-Actin      | GGCACCACACCTTCTACAATG     | GGGGTGTGAAGGTCTCAAAC      |
| Drp1         | GGGCACTTAAATTGGGCTCC      | TGTATTCTGTTGGCGTGGAAC     |
| Opa1         | TCACCTCTGCGTTTATTTGAAGA   | GGGTAGAACGGGAGGAAAGG      |
| Mff          | AAGTGGCTCTCACCTAGCA       | TGCCCACTCACCAAATGT        |
| Mfn1         | TATCGATGCCTTGCGGAGAT      | GGCGAATCACAACACTTCCA      |
| Mfn2         | GGAGACCAACAAGGACTGGA      | TGCACAGTGACTTTCAACCG      |
| Fis1         | GGCTGTCTCCAAGTCCAAATC     | GGAGAAAAGGGAAGGCGATG      |
| Ucp1         | AGGCTTCCAGTACCATTAGGT     | CTGAGTGAGGCAAAGCTGATTT    |
| Fabp4        | AAGGTGAAGAGCATCATAACCCT   | TCACGCCTTTCATAACACATTCC   |
| Cd36         | AGATGACGTGGCAAAGAACAG     | CCTTGGCTAGATAACGAACTCTG   |
| Atgl         | ACCACCCTTTCCAACATGCTA     | GGCAGAGTATAGGGCACCA       |
| Hsl          | TGGCACACCATTTTGACCTG      | TTGCGGTTAGAAGCCACATAG     |
| Mgl          | ACCATGCTGTGATGCTCTCTG     | CAAACGCCTCGGGGATAACC      |
| Acc1         | GATGAACCATCTCCGTTGGC      | GACCCAATTATGAATCGGGAGTG   |
| Fasn         | GGAGGTGGTGATAGCCGGTAT     | TGGGTAATCCATAGAGCCCAG     |
| Scd1         | AGATCTCCAGTTCTTACACGACCAC | GACGGATGTCTTCTTCCAGGTG    |
| Dgat1        | TTCCGCCTCTGGGCATT         | AGAATCGGCCCAACAATCCA      |
| Dgat2        | AGTGGCAATGCTATCATCATCGT   | TCTTCTGGACCCATCGGCCCCAGGA |
| Il1b         | CAACCAACAAGTGATATTCTCCATG | GATCCACACTCTCCAGCTGCA     |
| Il10         | GGGTTGCCAAGCCTTATCG       | TTCACCCAGGGAATTCAAATG     |
| Cd86         | TGTTTCCGTGGAGACGCAAG      | TTGAGCCTTTGTAAATGGGCA     |
| Cd206        | CTCTGTTTCAGCTATTGGACGC    | CGGAATTTCTGGGATTCAGCTTC   |
| Cd163        | TCCACACGTCCAGAACAGTC      | CCTTGGAACAGAGACAGGC       |
|              |                           |                           |
| <b>Human</b> | <b>Forward (5'-3')</b>    | <b>Reverse (5'-3')</b>    |
| ATF4         | GTTCTCCAGCGACAAGGCTA      | ATCCTGCTTGCTGTTGTTGG      |
| BIP          | TGTTCAACCAATTATCAGCAAATC  | TTCTGCTGTATCCTCTTACCAGT   |
| CHOP         | AGAACCAGGAAACGGAAACAGA    | TCTCCTTCATGCGCTGCTTT      |
| uXBP1        | CAGCACTCAGACTACGTGCA      | ATCCATGGGGAGATGTTCTGG     |
| sXBP1        | CTGAGTCCGAATCAGGTGCAG     | ATCCATGGGGAGATGTTCTGG     |
| tXBP1        | TGGCCGGGTCTGCTGAGTCCG     | ATCCATGGGGAGATGTTCTGG     |
